# Supplementary material
Source: publisher figshare collection journal article supplement (https://acs.figshare.com/ndownloader/files/4087888)
Supplement: Supplementary file 1 [file 4087888]

## **Supplemental Information**

### **Poly(butylene 2,5-furan dicarboxylate), a biobased alternative to PBT: synthesis, physical properties and crystal structure**

<sup>a</sup>Jianhui Zhu, <sup>a,§</sup>Jiali Cai, <sup>a</sup>Wenchun Xie, <sup>a</sup>Pin-Hsuan Chen, <sup>b</sup>Massimo Gazzano, <sup>b</sup>Mariastella Scandola,  
<sup>a</sup>Richard A. Gross<sup>\*</sup>

<sup>a</sup>NSF I/UCRC for Biocatalysis & Bioprocessing of Macromolecules, Polytechnic Institute of NYU, Six  
Metrotech Center, Brooklyn, New York 11201.

<sup>b</sup>Chemistry Department “G. Ciamician” and National Consortium of Materials Science and Technology  
(INSTM, Bologna RU), University of Bologna, via Selmi 2, 40126.

<sup>§</sup> Contribute equally to the first author, <sup>\*</sup> To whom the correspondence should be addressed.

**Table S1.** Bond lengths (Å) in PBF structure as shown in Fig. 8.

|       |       |        |       |
|-------|-------|--------|-------|
| C2-O1 | 1.425 | C1-C2  | 1.534 |
| C3-O1 | 1.359 | C1-C10 | 1.518 |
| C3-O2 | 1.230 | C4-C5  | 1.350 |
| C4-O3 | 1.359 | C5-C6  | 1.417 |
|       |       | C3-C4  | 1.495 |

**Table S2.** Comparison between cell parameters of PBF and  $\alpha$ - and  $\beta$ -PBT.

|               | a<br>(Å) | b<br>(Å) | c<br>(Å) | $\alpha$<br>(°) | $\beta$<br>(°) | $\gamma$<br>(°) |
|---------------|----------|----------|----------|-----------------|----------------|-----------------|
| $\alpha$ -PBT | 4.83     | 5.94     | 11.59    | 99.7            | 115.2          | 110.8           |
| $\beta$ -PBT  | 4.95     | 5.67     | 12.95    | 101.7           | 121.8          | 99.9            |
| PBF           | 4.78     | 6.03     | 12.31    | 110.1           | 121.1          | 100.6           |

**Table S3.** Young's modulus, elongation to break and stress at break for PBF sample 6 differing in crystallinity.

| Sample No.       | Melting enthalpy contribution to initial crystallinity, J/g | Crystallinity, % from X-ray | Young's Modulus (MPa) | Elongation at break, % | Stress at break (MPa) |
|------------------|-------------------------------------------------------------|-----------------------------|-----------------------|------------------------|-----------------------|
| 6-1 <sup>*</sup> | 6.3                                                         | 8.1                         | 959±58                | 1055±56                | 31.8±2.9              |
| 6-2              | 9.2                                                         | 24.9                        | 1054±60               | 445±32                 | 27.5±0.4              |
| 6-3              | 39.5                                                        | 37.7                        | 1091±45               | 284±93                 | 35.5±1.9              |
| 6-4              | 47.2                                                        | 44.0                        | 1112±53               | 7.4±2                  | 43.2±8.5              |
| PBT              | 48.0                                                        |                             | 950±70                | 272±71                 | 37.6±2.5              |

<sup>a</sup> The true stress at break calculated after correction for the cross-sectional area.

\*Different thermal processing on sample 6 , the details were described in experimental section.

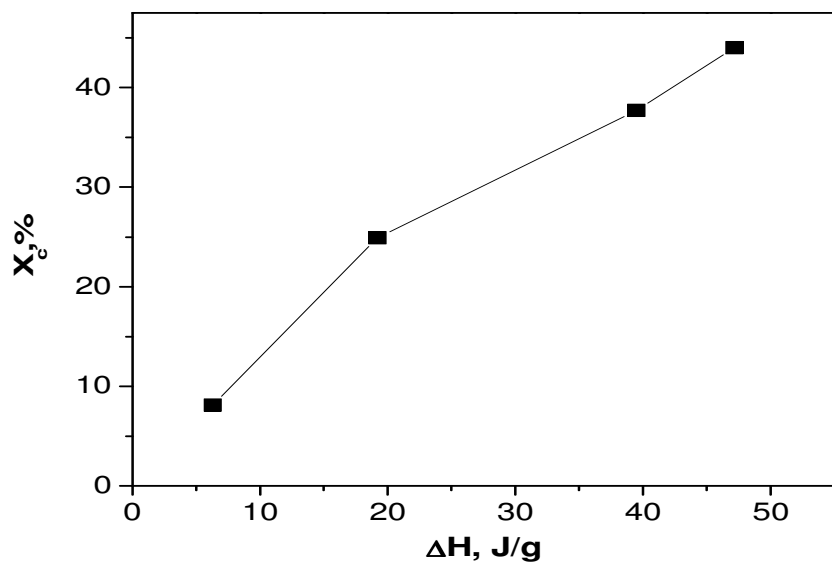

**Figure S1a** Relationship of %-crystallinity, determined by X-ray diffraction, and DSC determined values of enthalpy difference ( $\Delta H$  = difference between the melting enthalpy and the cold crystallization enthalpy) for PBF sample 6 annealed under different conditions.

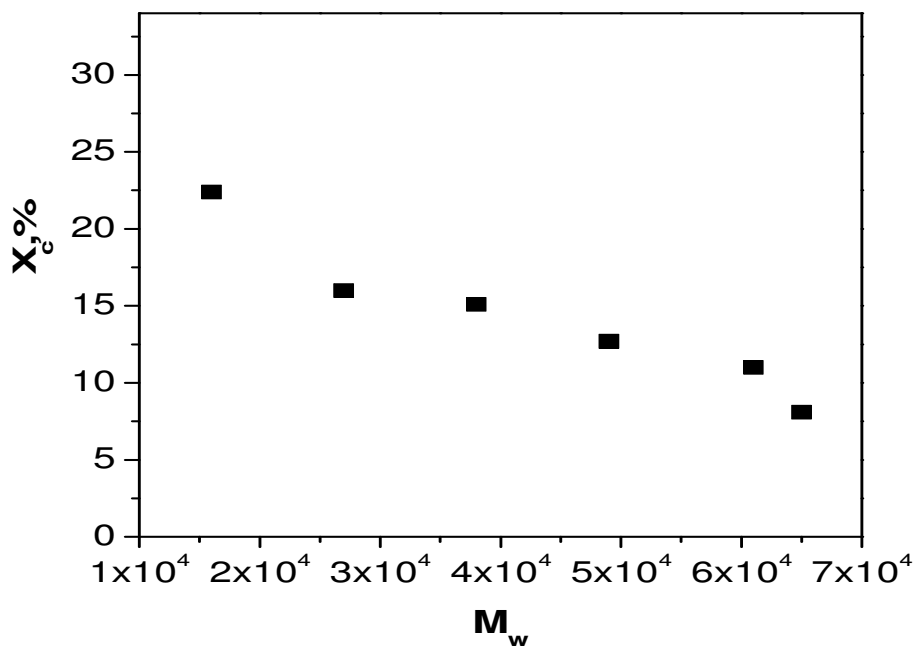

**Figure S1b.** Percent crystallinity of PBF sample bars for tensile testing as a function of molecular weight. Values of  $\chi_c$  were determined from experimental  $\Delta H$  values. That is, the plot shown in Figure S1a was used to correlate experimental  $\Delta H$  and  $\chi_c$ .

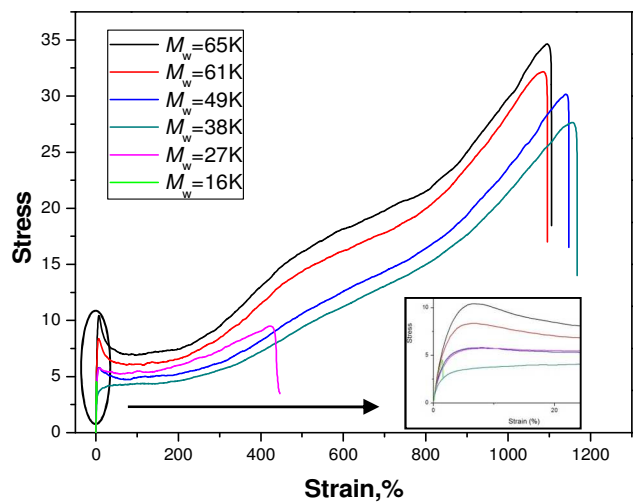

**Figure S2.** Stress-strain curves for the series of PBF Samples 1-6 with different  $M_w$ .

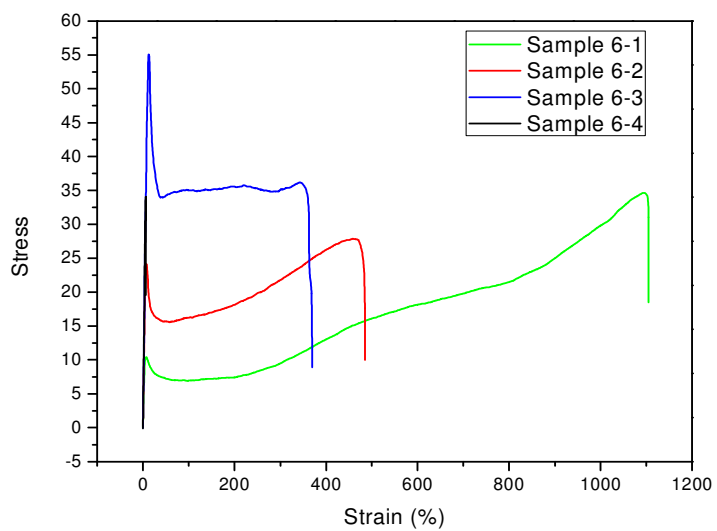

**Figure S3.** Stress-strain curves for the series of PBF Sample 6 with different crystallinity.
